# Supplementary material for: Heparin-stabilised iron oxide for MR applications: a relaxometric study
Source: Royal Society of Chemistry journal article supplement (doi:10.1039/c6tb00832a), 2016-01-01
Supplement: c6tb00832a1.pdf [file c6tb00832a1.pdf]

## Heparin-stabilised Iron Oxide for MR Applications: A Relaxometric Study

Lucy Ternent,<sup>a</sup> Daniel Alexander Mayoh,<sup>b</sup> Martin Richard Lees<sup>b</sup> and Gemma-Louise Davies<sup>c\*</sup>

### Supplementary Information

**Table S1.** Zeta potential measurements ( $\zeta$ -potential) of solutions of reagents before mixing, after mixing (before co-precipitation) and after co-precipitation (and formation of nanoparticles) for Samples 1-5, prepared according to Table 1.

| Sample | Fe <sup>II/III</sup> solution<br>$\zeta$ -potential (mV) | Heparin solution<br>$\zeta$ -potential (mV) | $\zeta$ -potential of<br>reagent<br>solution before<br>precipitation<br>(mV) | $\zeta$ -potential after<br>precipitation<br>(mV) |
|--------|----------------------------------------------------------|---------------------------------------------|------------------------------------------------------------------------------|---------------------------------------------------|
| 1      | +6.9±2.8                                                 | -54.4±4.4                                   | -1.06±0.6                                                                    | -26.5±0.8                                         |
| 2      | +6.9±2.8                                                 | -41.1±7.2                                   | -5.5±0.6                                                                     | -17.1±0.4                                         |
| 3      | +6.9±2.8                                                 | -48.2±2.1                                   | -4.4±1.7                                                                     | -31.2 0.4                                         |
| 4      | +6.9±2.8                                                 | -48±5.2                                     | -4.3±0.8                                                                     | -33.2±0.1                                         |
| 5      | +6.9±2.8                                                 | -44.7±7.2                                   | -13.8±0.7                                                                    | -36.8±0.8                                         |
